# Supplementary material
Source: PubMed Central journal article supplement (PMC3674108)
Supplement: NIHMS476305-supplement-1_si_001.pdf [file NIHMS476305-supplement-1_si_001.pdf]

## Supporting Information

### **Mg<sup>2+</sup> binds to the surface of thymidylate synthase and affects hydride transfer at the interior active site**

Zhen Wang,<sup>1,‡</sup> Paul J. Sapienza,<sup>2</sup> Thelma Abeysinghe,<sup>1</sup> Calvin Luzum,<sup>1,†</sup> Andrew L. Lee,<sup>2,3</sup> Janet S. Finer-Moore,<sup>4</sup> Robert M. Stroud,<sup>4</sup> and Amnon Kohen<sup>1,\*</sup>

<sup>1</sup> Department of Chemistry, University of Iowa, Iowa City, IA 52242, USA

<sup>2</sup> Division of Chemical Biology and Medicinal Chemistry, Eshelman School of Pharmacy, University of North Carolina at Chapel Hill, Chapel Hill, NC 27599, USA

<sup>3</sup> Department of Biochemistry and Biophysics, School of Medicine, University of North Carolina at Chapel Hill, Chapel Hill, NC 27599, USA

<sup>4</sup> Department of Biochemistry & Biophysics, University of California, San Francisco, CA 94158, USA

\* Author to whom correspondences should be addressed. E-mail: [amnon-kohen@uiowa.edu](mailto:amnon-kohen@uiowa.edu) Phone #: 319-335-0234

‡ This author's present address: Department of Biochemistry, Albert Einstein College of Medicine, Bronx, NY 10461

† This author's present address: Ensign, United States Navy, Goose Creek, SC 29445

## Supplementary Figures

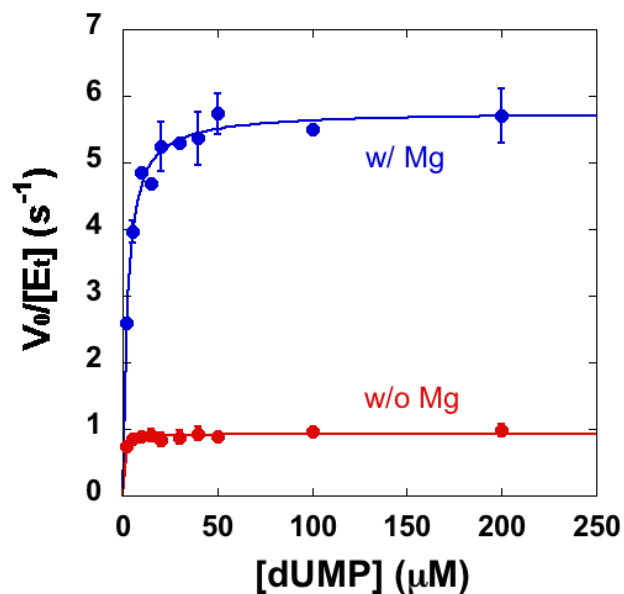

Figure S1. The initial velocity of ecTSase-catalyzed reaction vs. concentration of dUMP, in the absence (red) and presence (blue) of 50 mM MgCl<sub>2</sub>.

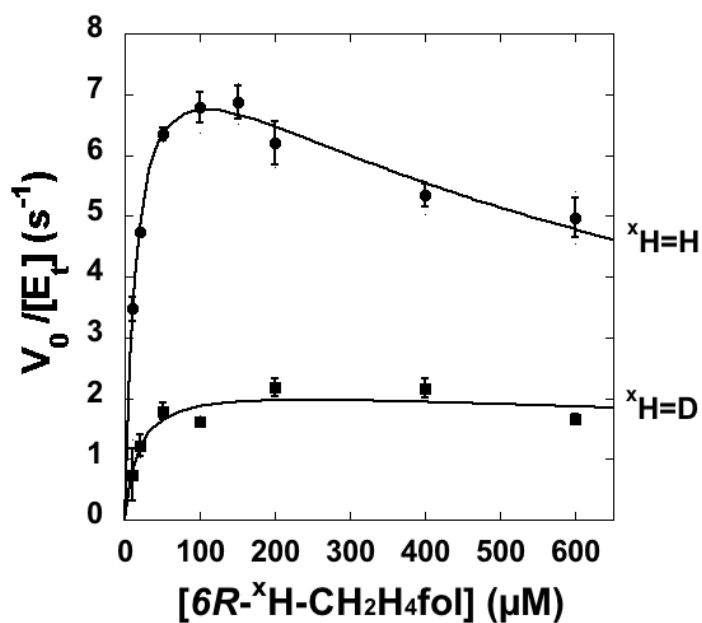

Figure S2. The initial velocity of TSase-catalyzed reaction vs. concentration of 6R-ˣH-CH<sub>2</sub>H<sub>4</sub>fol (ˣH = H or D), in the presence of 50 mM MgCl<sub>2</sub> at 25 °C.

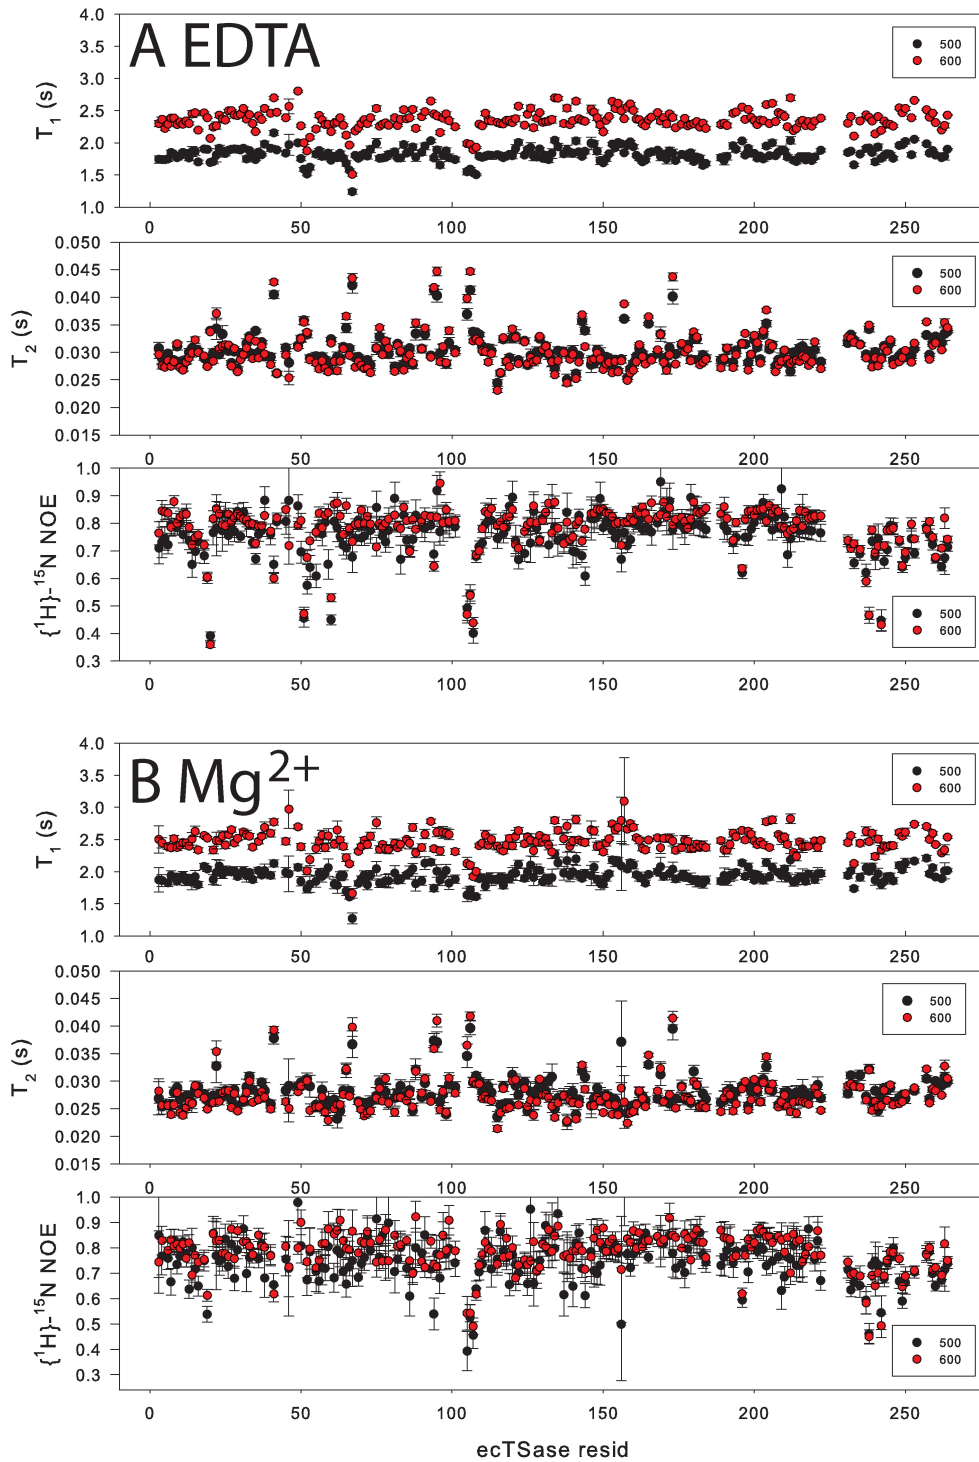

Figure S3. T<sub>1</sub>, T<sub>2</sub>, and {<sup>1</sup>H}-<sup>15</sup>N NOE for ecTSase-FdUMP-CH<sub>2</sub>H<sub>4</sub>Fol (A) without and (B) with MgCl<sub>2</sub>.<sup>1</sup> Data at 500 and 600 MHz are in black and red, respectively.

## A EDTA

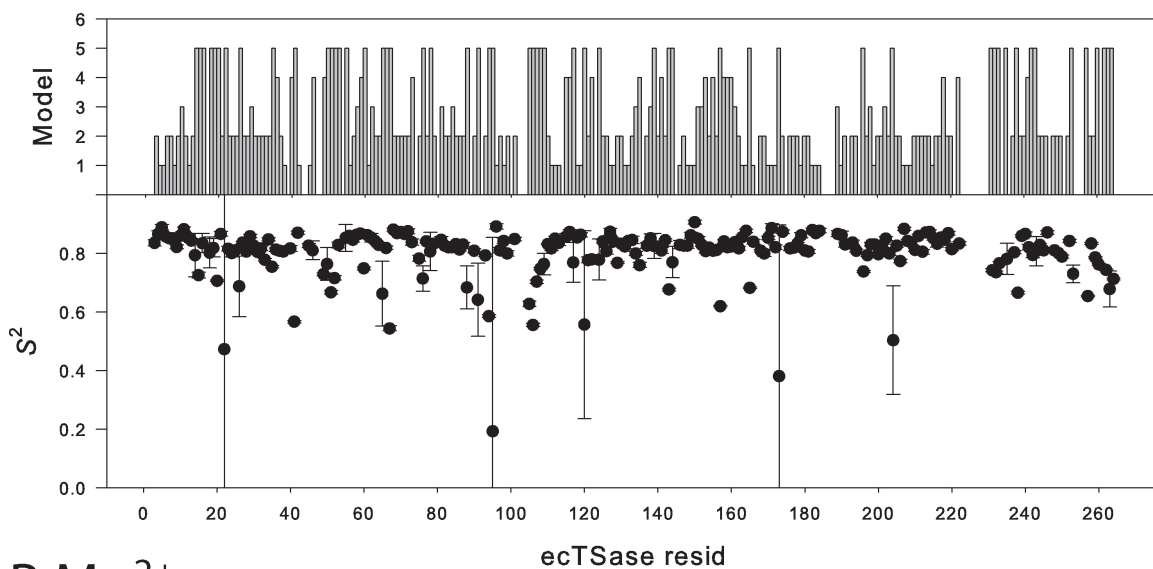

## B Mg<sup>2+</sup>

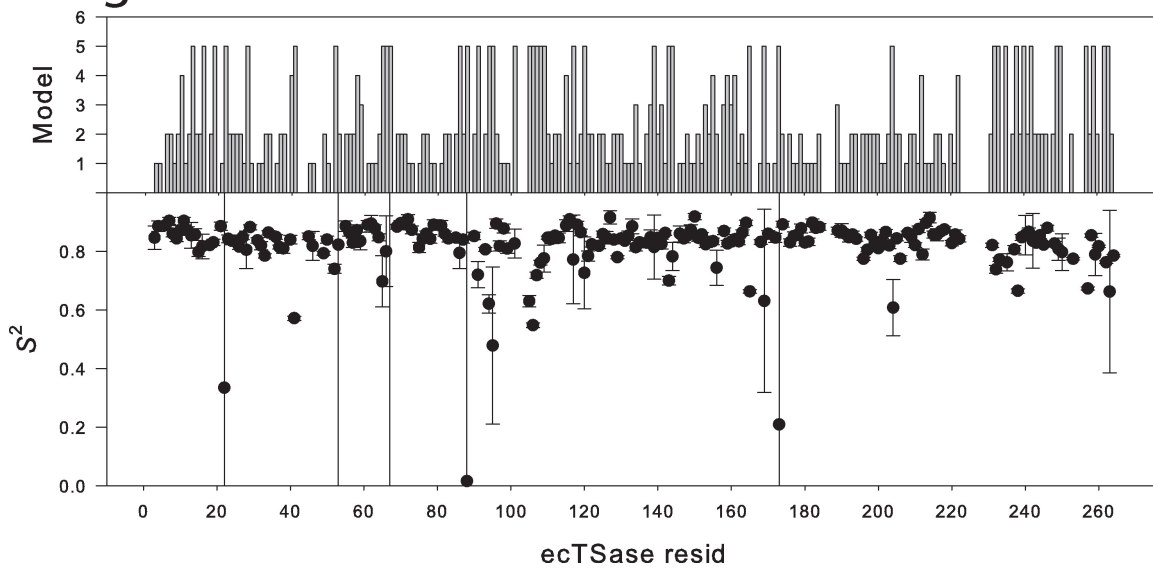

Figure S4. Model-free  $^{15}\text{N}$ - $^1\text{H}$  order parameters for the ecTSase-FdUMP-CH<sub>2</sub>H<sub>4</sub>fol complex (A) without and (B) with MgCl<sub>2</sub>. The top plot in each panel shows the model that best fits the raw relaxation data.<sup>1</sup> Models are: 1)  $S^2$  only, 2)  $S^2$ ,  $t_e$ , 3)  $S^2$ ,  $R_{ex}$ , 4)  $S^2$ ,  $t_e$ ,  $R_{ex}$ , 5)  $S_f^2$ ,  $S^2$ ,  $t_e = t_s$ .<sup>2</sup>

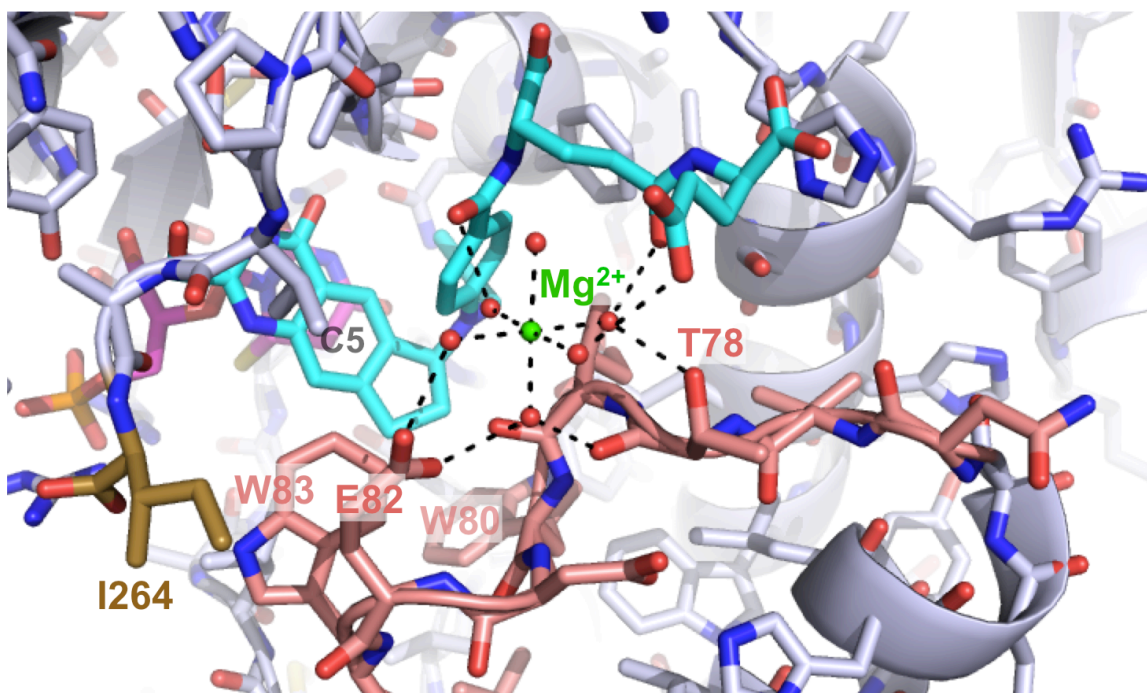

Figure S5.  $Mg^{2+}$  (green) binds to the surface of the ternary complex of ecTSase with dUMP and a di-Glu antifolate inhibitor BGC945 (cyan).<sup>3</sup> All other molecules are colored in the same way as Figure 5 in the main text.  $Mg^{2+}$  mediates an H-bond network between the first Glu of the di-Glu moiety of the inhibitor and the backbone carboxylates and side chains (e.g. T78 and E82) of the loop, which resembles the interactions in the ecTSase-dUMP-CB3717 complex (Figure 5).

## Supplementary Tables

Table S1. Steady state kinetic parameters of ecTSase in the absence (w/o, red) and presence (w/, blue) of 50 mM  $MgCl_2$ .

| w/ $Mg^{2+}$                   | 5 °C                     | 15 °C                      | 25 °C                      | 35 °C                     |
|--------------------------------|--------------------------|----------------------------|----------------------------|---------------------------|
| w/o $Mg^{2+}$                  | 5 °C                     | 20 °C                      | 30 °C                      | 40 °C                     |
| $k_{cat}$ ( $s^{-1}$ )         | 5.1 ± 0.3<br>0.73 ± 0.06 | 6.5 ± 0.2<br>1.02 ± 0.03   | 8.7 ± 0.2<br>1.32 ± 0.02   | 10.3 ± 0.3<br>1.62 ± 0.06 |
| $K_M^{CH_3H_4fol}$ ( $\mu M$ ) | 8 ± 1<br>24 ± 5          | 11 ± 1<br>20 ± 2           | 15 ± 1<br>14 ± 1           | 19 ± 2<br>24 ± 3          |
| $K_I^{CH_3H_4fol}$ (mM)        | 0.6 ± 0.1<br>0.43 ± 0.05 | 0.52 ± 0.05<br>0.53 ± 0.02 | 0.76 ± 0.07<br>1.09 ± 0.07 | 1.5 ± 0.2<br>1.5 ± 0.3    |

Table S2. The observed KIE on  $k_{cat}/K_M$ , the intrinsic KIE on the hydride transfer, and  $C_f$  in the presence of 50 mM MgCl<sub>2</sub>.

| Temperature °C | Observed KIE <sup>T</sup> ( $k_{cat}/K_M$ ) <sub>L</sub> |             | Intrinsic KIE on the hydride transfer <sup>a</sup> |           |             | $C_f$     |
|----------------|----------------------------------------------------------|-------------|----------------------------------------------------|-----------|-------------|-----------|
|                | H/T                                                      | D/T         | H/T                                                | H/D       | D/T         |           |
| 5              | 2.59 ± 0.02                                              | 1.47 ± 0.02 | 7.5 ± 0.8                                          | 4.0 ± 0.3 | 1.83 ± 0.06 | 3.1 ± 0.5 |
| 15             | 3.51 ± 0.02                                              | 1.60 ± 0.02 | 7.6 ± 0.6                                          | 4.1 ± 0.2 | 1.83 ± 0.04 | 1.6 ± 0.2 |
| 25             | 4.14 ± 0.02                                              | 1.65 ± 0.01 | 7.2 ± 0.4                                          | 3.9 ± 0.2 | 1.81 ± 0.03 | 1.0 ± 0.1 |
| 35             | 3.91 ± 0.05                                              | 1.63 ± 0.03 | 7.4 ± 0.9                                          | 4.0 ± 0.4 | 1.82 ± 0.07 | 1.2 ± 0.3 |

<sup>a</sup> The intrinsic H/T KIE is numerically solved from Eq 8 in the main text, and the intrinsic H/D and D/T KIEs are calculated from the intrinsic H/T KIE using the Swain-Schaad relationship.<sup>4</sup>

Table S3 Data collection and refinement statistics from ref 3.

| PDB ID                      | 4ISK            |                                          |            |
|-----------------------------|-----------------|------------------------------------------|------------|
| <b>Data collection</b>      |                 | <b>Refinement</b>                        |            |
| X-ray source                | ALS 8.3.1       | Resolution (Å)                           | 29.81-1.75 |
| X-ray wavelength (Å)        | 1.115869        | R <sub>work</sub> /R <sub>free</sub> (%) | 19.4/24.8  |
| Space group                 | P21             | No. reflections                          | 200717     |
| Cell dimensions             |                 | Completeness for range (%)               | 97.8       |
| <i>a, b, c</i> (Å)          | 95.9,85.5,134.3 |                                          |            |
| $\alpha, \beta, \gamma$ (°) | (90, 109.4, 90) |                                          |            |
| Resolution (Å)              | 30-1.75         | r.m.s. deviations                        |            |
| No. of unique reflections   | 204820          | Bond length (Å)                          | 0.013      |
| Rmerge (%)                  | 7.0             | Bond angles (°)                          | 1.57       |
| I/ $\sigma$ I               | 8.79            | Ramachandran Plot (%)                    |            |
| Completeness (%)            | 99.8            | Favored regions                          | 98.0       |
| Redundancy                  | 2.98            | Allowed regions                          | 1.60       |

## References

- (1) Sapienza, P. J., Lee, A. L. *Biomol. NMR Assigm.* **2013**, Submitted.
- (2) Mandel, A. M., Akke, M., Palmer, A. G., 3rd *J. Mol. Biol.* **1995**, *246*, 144-163.
- (3) Tochowicz, A., Dalziel, S., Eidam, O., O'Connell 3rd, J. D., Griner, S., Finer-Moore, J. S., Stroud, R. M. *J Med. Chem.* **2013**, Submitted.
- (4) Swain, C. G., Stivers, E. C., Reuwer, J. F., Schaad, L. J. *J. Am. Chem. Soc.* **1958**, *80*, 5885-5893.
